# Supplementary material for: Six Cell Cycle-related Genes Serve as Potential Prognostic Biomarkers and Correlated with Immune Infiltrates in Hepatocellular Carcinoma
Source: PubMed Central journal article supplement (PMC9809328; doi:10.7150/jca.76809), 2023-01-01
Supplement: jcav14p0009s1.pdf [file jcav14p0009s1.pdf]

# Six Cell Cycle-related Genes Are Prognostic Biomarkers and Correlated with Immune Infiltrates in Hepatocellular Carcinoma

Ying Shi<sup>1</sup>, Xiaopu Sang<sup>2</sup>, Jiali Deng<sup>1</sup>, Xiaoni Chen<sup>3</sup>, Fenfang Wu<sup>1,3\*</sup>, Anlong Xu<sup>1,2\*</sup>

<sup>1</sup>State Key Laboratory of Biocontrol, Guangdong Province Key Laboratory of Pharmaceutical Functional Genes, College of Life Sciences, Sun Yat-Sen University, Guangzhou, China; <sup>2</sup>School of Life Sciences, Beijing University of Chinese Medicine, Beijing, China; <sup>3</sup>Department of Central Laboratory, Shenzhen Hospital, Beijing University of Chinese Medicine, Shenzhen, China.

\*Correspondence: Anlong Xu ([xuanlong@bucm.edu.cn](mailto:xuanlong@bucm.edu.cn)); Fenfang Wu ([wufenfang19@126.com](mailto:wufenfang19@126.com))

## The Expression Levels of Cell Cycle-related Genes and Correlation with Pathological Parameters in HCC

We also examined cell cycle-related genes expression between the tumor and normal tissues using UALCAN database (tumor sample: n = 371 vs. normal sample: n = 50) (**Supplementary Figure 1**). The result showed that *CDK1* ( $P = 1E-12$ ), *CDK5* ( $P = 1.62458935193399E-12$ ), *CDC20* ( $P = 1.62436730732907E-12$ ), *CCNA2* ( $P = 1.62447832963153E-12$ ), *CCNB1* ( $P = 1E-12$ ), and *CCNB2* ( $P = 1E-12$ ) expression was significantly increased compared with normal tissues.

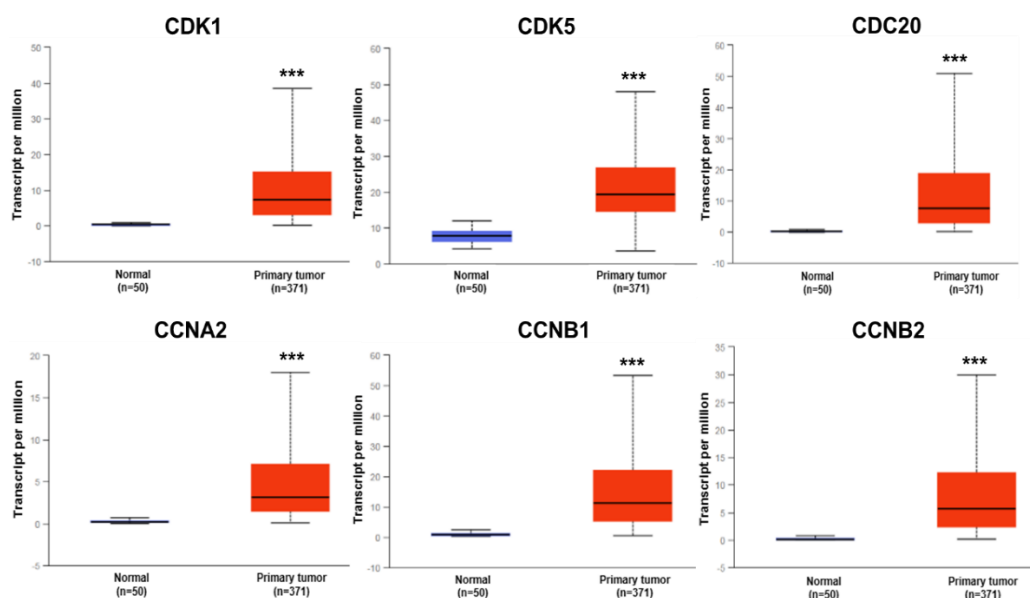

**SUPPLEMENTARY FIGURE 1** | *CDK1*, *CDK5*, *CDC20*, *CCNA2*, *CCNB1*, and *CCNB2* expression increased in HCC presented in the form of a boxplot (Ualcan database). (\*\*\*)  $P < 0.001$ .

## Expression of Cell Cycle-related Genes in HCC Based on *TP53* Mutation Status in UALCAN Database

We individually analyzed the expression of six hub cell cycle-related genes in HCC based on *TP53* mutation status. The results showed that the mRNA expression levels of *CDK1* ( $P = 8.44949999967426E-07$ ), *CDK5* ( $P = 2.18779999999752E-05$ ), *CDC20* ( $P = 3.42399997244058E-09$ ), *CCNA2* ( $P = 2.377900E-02$ ), *CCNB1* ( $P = 1.00539999658977E-08$ ) and *CCNB2* ( $P = 1.34450000022213E-08$ ) was significantly increased in *TP53*-mutant sample compared to *TP53*-

nonmutant (**Supplementary Table 1**).

**SUPPLEMENTARY TABLE 1** | Expression of Cell Cycle-related Genes in HCC Based on *TP53* Mutation Status in UALCAN Database.

| Gene name | TPM (median)              |                              | <i>P</i> value              |
|-----------|---------------------------|------------------------------|-----------------------------|
|           | <i>TP53</i> -Mutant (105) | <i>TP53</i> -NonMutant (255) |                             |
| CDK1      | 12.931                    | 5.496                        | <b>8.44949999967426E-07</b> |
| CDK5      | 24.333                    | 18.114                       | <b>2.18779999999752E-05</b> |
| CDC20     | 22.126                    | 5.238                        | <b>3.42399997244058E-09</b> |
| CCNA2     | 5.838                     | 2.513                        | <b>2.377900E-02</b>         |
| CCNB1     | 21.55                     | 8.566                        | <b>1.00539999658977E-08</b> |
| CCNB2     | 11.719                    | 4.731                        | <b>1.34450000022213E-08</b> |

TPM, Transcript per million. Bold values indicate statistically significant ( $P < 0.05$ ).

**Associations of *CDK1*, *CDK5*, *CDC20*, *CCNA2*, *CCNB1*, and *CCNB2* mRNA Expression with Clinico-pathological Variables in HCC Patients.**

Additionally, the association of the expression of these genes with the HCC stage and grade was analyzed. UALCAN database showed that *CDK1*, *CDK5*, *CDC20*, *CCNA2*, *CCNB1* and *CCNB2* expression were significant differences in different stage and grade, respectively. (**Supplementary Figure 2**). Meanwhile, TISIDB database showed that *CDK1* ( $P = 7.26E-05$ ), *CDC20* ( $P = 0.000101$ ), *CCNA2* ( $P = 0.000332$ ), *CCNB1* ( $P = 5.01E-05$ ) and *CCNB2* ( $P = 0.000557$ ) high expression in stage 2 and 3 compared with normal and stage 1. The results also showed that *CDK1* ( $P = 1E-10$ ), *CDC20* ( $P = 1.3E-10$ ), *CCNA2* ( $P = 2.28E-7$ ), *CCNB1* ( $P = 9.67E-12$ ) and *CCNB2* ( $P = 3.79E-10$ ) high expression in grade 2, 3 and 4 compared with normal and stage 1.

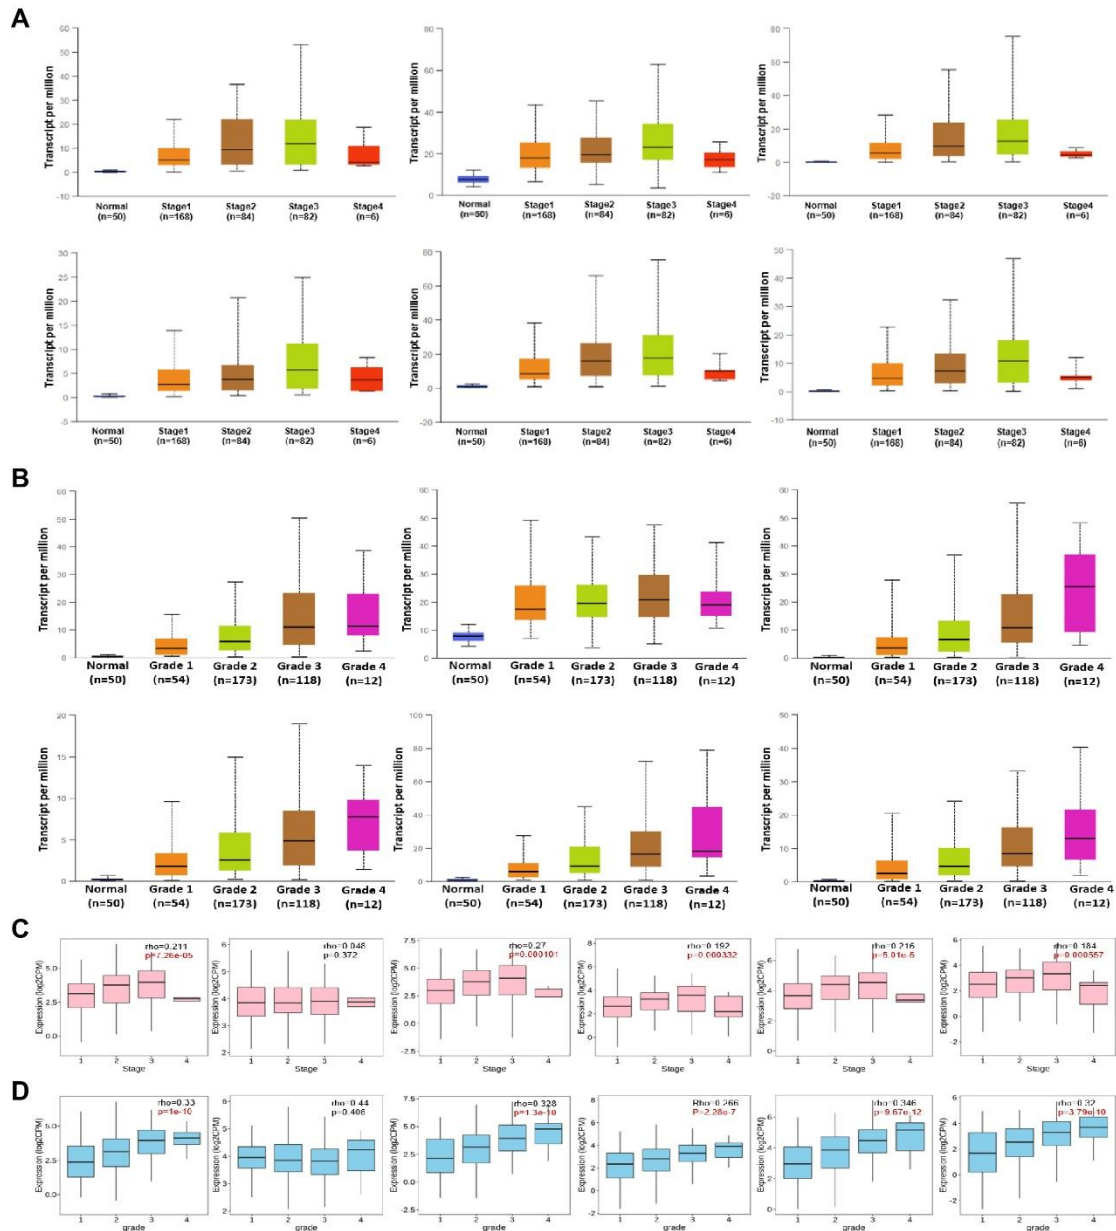

**SUPPLEMENTARY FIGURE 2 | A.** Correlation of the *CDK1*, *CDK5*, *CDC20*, *CCNA2*, *CCNB1*, and *CCNB2* expression with tumor stage among HCC cases (UALCAN database). **B.** Correlation of the *CDK1*, *CDK5*, *CDC20*, *CCNA2*, *CCNB1*, and *CCNB2* expression with tumor grade among HCC cases (UALCAN database). **C.** Correlation of the *CDK1*, *CDK5*, *CDC20*, *CCNA2*, *CCNB1*, and *CCNB2* expression with tumor stage among HCC cases (TISIDB database). **D.** Correlation of the *CDK1*, *CDK5*, *CDC20*, *CCNA2*, *CCNB1*, and *CCNB2* expression with tumor grade among HCC cases (TISIDB database).

### Relationship between Elevated *CDK1*, *CDK5*, *CDC20*, *CCNA2*, *CCNB1*, and *CCNB2* mRNA Expression and Dismal Prognosis for HCC Cases.

The crucial cell cycle-related genes efficiency in HCC patient survival was also found. The UALCAN database was utilized to examine the relationship of mRNA expression of *CDK1*, *CDK5*, *CDC20*, *CCNA2*, *CCNB1*, and *CCNB2* with HCC patient survival based on the public datasets. Our

results suggested that increased *CDK1* ( $P = 0.0001$ ), *CDK5* ( $P = 0.0011$ ), *CDC20* ( $P = 0.0001$ ), *CCNA2* ( $P = 0.0013$ ), *CCNB1* ( $P = 0.0001$ ), and *CCNB2* ( $P = 0.00055$ ) showed a significant relationship with poor OS. (Supplement Figure 3).

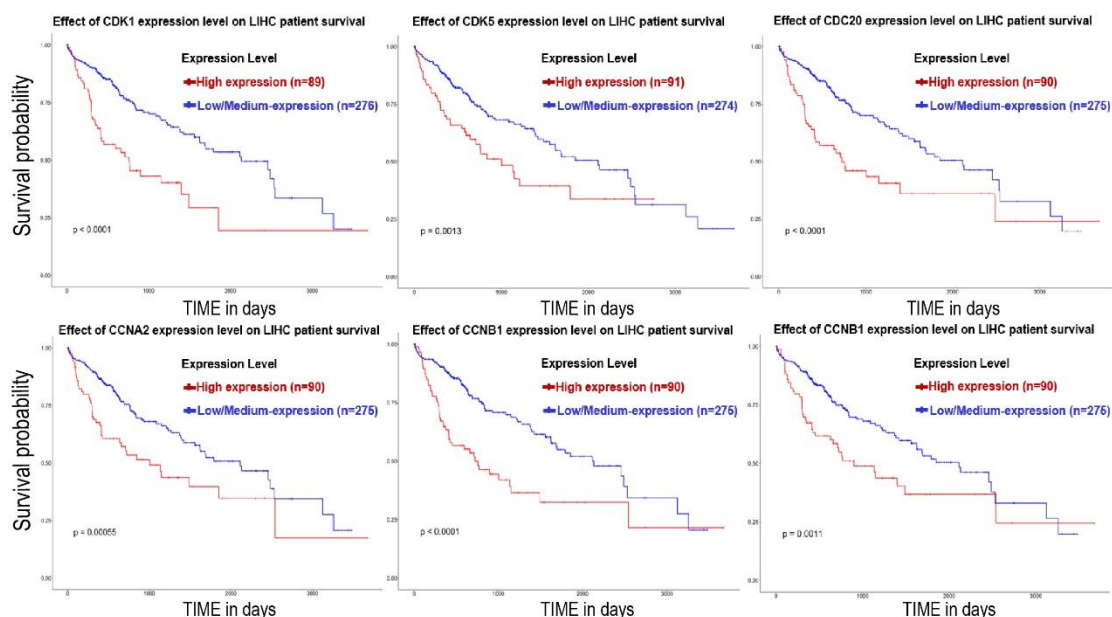

**SUPPLEMENTARY FIGURE 3** | Significance of the *CDK1*, *CDK5*, *CDC20*, *CCNA2*, *CCNB1*, and *CCNB2* mRNA expression in predicting the prognosis for HCC cases (UALCAN database).

### ***CDK1*, *CDK5*, *CDC20*, *CCNA2*, *CCNB1*, and *CCNB2* Expression Is Correlated with Immune Infiltration Level in HCC.**

We also used TIMER database to analyze whether *CDK1*, *CDK5*, *CDC20*, *CCNA2*, *CCNB1* and *CCNB2* expression were correlated with immune infiltration levels in HCC. Our results showed that the levels of cell cycle-related genes expression had remarkable correlations with B cell, CD8+ T cells, CD4+ T cells, neutrophils, macrophages, and DCs in HCC (Figure 5). The  $P$ -value were listed in Supplementary Table 2.

**SUPPLEMENTARY TABLE 2** |  $P$ -value of the cell cycle-related genes expression correlations with B cell, CD8+ T cells, CD4+ T cells, neutrophils, macrophages, and DCs in HCC.

| Gene         | B cell          | CD8+ T cell     | CD4+ T cell     | Macrophage      | Neutrophils     | Dendritic cell  |
|--------------|-----------------|-----------------|-----------------|-----------------|-----------------|-----------------|
| <i>CDK1</i>  | <b>2.97e-20</b> | <b>2.38e-09</b> | <b>2.72e-10</b> | <b>2.60e-18</b> | <b>4.98e-11</b> | <b>1.17e-17</b> |
| <i>CDK5</i>  | <b>1.28e-02</b> | 0.305           | 0.0704          | <b>1.31e-02</b> | <b>6.89e-04</b> | <b>1.64e-02</b> |
| <i>CDC20</i> | <b>8.39e-19</b> | <b>2.01e-11</b> | <b>4.78e-07</b> | <b>6.63e-16</b> | <b>2.12e-09</b> | <b>3.54e-19</b> |
| <i>CCNA2</i> | <b>7.31e-21</b> | <b>1.63e-11</b> | <b>1.60e-09</b> | <b>1.21e-14</b> | <b>2.41e-12</b> | <b>8.02e-22</b> |
| <i>CCNB1</i> | <b>2.94e-20</b> | <b>1.12e-08</b> | <b>9.33e-08</b> | <b>5.42e-16</b> | <b>6.81e-11</b> | <b>1.15e-16</b> |
| <i>CCNB2</i> | <b>6.57e-22</b> | <b>2.78e-09</b> | <b>7.86e-09</b> | <b>6.27e-18</b> | <b>1.49e-09</b> | <b>6.57e-19</b> |

Bold values indicate statistically significant ( $P < 0.05$ ).

**SUPPLEMENTARY TABLE 3** | Correlation analysis between cell cycle-related genes and markers of immune cells in TIMER.

| Description                | Gene markers       | CDK1  |        | CDK5   |        | CDC20 |       |
|----------------------------|--------------------|-------|--------|--------|--------|-------|-------|
|                            |                    | Cor   | P      | Cor    | P      | Cor   | P     |
| <b>CD8+ T cell</b>         | CD8A               | 0.198 | ***    | -0.04  | 0.438  | 0.218 | ***   |
|                            | CD8B               | 0.184 | ***    | 0.009  | 0.857  | 0.256 | ***   |
| <b>T cell (general)</b>    | CD3D               | 0.274 | ***    | 0.06   | 0.25   | 0.364 | ***   |
|                            | CD3E               | 0.202 | ***    | 0.124  | **     | 0.217 | ***   |
|                            | CD2                | 0.216 | ***    | 0.12   | *      | 0.243 | ***   |
| <b>B cell</b>              | CD19               | 0.273 | ***    | 0.043  | 0.408  | 0.275 | ***   |
|                            | CD79A              | 0.158 | ***    | 0.18   | ***    | 0.165 | *     |
| <b>Monocyte</b>            | CD86               | 0.284 | ***    | 0.069  | ***    | 0.326 | ***   |
|                            | CD115 (CSF1R)      | 0.131 | *      | 0.088  | 0.0918 | 0.179 | ***   |
| <b>TAM</b>                 | CCL2               | 0.039 | 0.459  | 0.02   | 0.701  | 0.038 | 0.464 |
|                            | CD68               | 0.23  | ***    | 0.076  | 0.142  | 0.242 | ***   |
|                            | IL10               | 0.219 | ***    | 0.012  | 0.822  | 0.23  | ***   |
| <b>M1 Macrophage</b>       | INOS (NOS2)        | 0.02  | 0.695  | 0.116  | *      | 0.098 | 0.058 |
|                            |                    |       |        |        |        |       | 8     |
|                            | IRF5               | 0.394 | ***    | 0.367  | ***    | 0.325 | ***   |
| <b>M2 Macrophage</b>       | COX2(PTGS2)        | 0.101 | 0.0526 | -0.109 | *      | 0.034 | 0.514 |
|                            | CD163              | 0.067 | 0.0197 | 0.043  | 0.406  | 0.046 | 0.38  |
|                            | VSIG4              | 0.08  | 0.123  | 0.149  | *      | 0.098 | 0.058 |
|                            |                    |       |        |        |        |       | 8     |
| <b>Neutrophils</b>         | MS4A4A             | 0.089 | 0.0859 | 0.056  | 0.285  | 0.089 | 0.086 |
|                            |                    |       |        |        |        |       | 9     |
|                            | CD66b<br>(CEACAM8) | 0.123 | *      | 0.031  | 0.558  | 0.092 | 0.077 |
|                            |                    |       |        |        |        |       | 5     |
| <b>Natural killer cell</b> | CD11b (ITGAM)      | 0.257 | ***    | 0.223  | ***    | 0.317 | ***   |
|                            | CCR7               | 0.089 | 0.0873 | 0.195  | ***    | 0.035 | 0.499 |
|                            | KIR2DL1            | 0.035 | 0.5    | 0.042  | 0.418  | 0.058 | 0.262 |
| <b>Dendritic cell</b>      | KIR2DL3            | 0.167 | **     | 0.076  | 0.145  | 0.139 | **    |
|                            | KIR2DL4            | 0.195 | ***    | 0.134  | ***    | 0.228 | ***   |
|                            | KIR3DL1            | 0.01  | 0.843  | 0.007  | 0.893  | 0.033 | 0.528 |
|                            | KIR3DL2            | 0.085 | 0.102  | -0.012 | 0.821  | 0.082 | 0.113 |
|                            | KIR3DL3            | 0.064 | 0.219  | -0.022 | 0.675  | 0.062 | 0.231 |
|                            | KIR2DS4            | 0.075 | 0.148  | 0.02   | 0.708  | 0.018 | 0.73  |
| <b>Th1</b>                 | HLA-DPB1           | 0.154 | **     | 0.03   | 0.563  | 0.196 | ***   |
|                            | HLA-DQB1           | 0.132 | *      | 0.025  | 0.628  | 0.193 | ***   |
|                            | HLA-DRA            | 0.17  | ***    | 0.027  | 0.601  | 0.18  | ***   |
|                            | HLA-DPA1           | 0.141 | **     | 0.041  | 0.426  | 0.151 | *     |
|                            | BDCA-1(CD1C)       | 0.121 | *      | -0.16  | *      | 0.063 | 0.225 |
|                            | BDCA-4(NRP1)       | 0.231 | ***    | 0.145  | *      | 0.114 | *     |
| <b>Th1</b>                 | CD11c (ITGAX)      | 0.331 | ***    | 0.045  | 0.384  | 0.318 | ***   |
|                            | T-bet (TBX21)      | 0.081 | 0.119  | -0.095 | 0.0683 | 0.073 | 0.159 |
|                            | STAT4              | 0.262 | ***    | -0.121 | 0.0194 | 0.263 | ***   |

|                          |                      |       |        |        |        |        |       |
|--------------------------|----------------------|-------|--------|--------|--------|--------|-------|
|                          | STAT1                | 0.372 | ***    | 0.031  | 0.552  | 0.287  | ***   |
|                          | IFN- $\gamma$ (IFNG) | 0.266 | ***    | 0.108  | *      | 0.319  | ***   |
|                          | TNF- $\alpha$ (TNF)  | 0.252 | ***    | -0.022 | ***    | 0.265  | ***   |
| <b>Th2</b>               | GATA3                | 0.208 | ***    | -0.111 | *      | 0.203  | ***   |
|                          | STAT6                | 0.114 | *      | 0.108  | *      | -0.026 | 0.62  |
|                          | STAT5A               | 0.265 | ***    | 0.208  | ***    | 0.26   | ***   |
|                          | IL13                 | 0.068 | 0.19   | 0.024  | 0.641  | 0.101  | 0.052 |
| <b>Tfh</b>               | BCL6                 | 0.161 | **     | 0.112  | 0.0306 | 0.075  | 0.15  |
|                          | IL21                 | 0.156 | **     | -0.002 | 0.962  | 0.136  | 0.087 |
|                          |                      |       |        |        |        |        | 2     |
| <b>Th17</b>              | STAT3                | 0.114 | *      | 0.108  | *      | 0.025  | 0.627 |
|                          | IL17A                | 0.135 | **     | -0.118 | 0.0232 | 0.043  | 0.411 |
| <b>Treg</b>              | FOXP3                | 0.163 | **     | 0.065  | 0.211  | 0.097  | 0.061 |
|                          |                      |       |        |        |        |        | 2     |
| <b>Treg</b>              | CCR8                 | 0.392 | ***    | 0.011  | 0.828  | 0.31   | ***   |
|                          | STAT5B               | 0.247 | ***    | 0.225  | ***    | 0.069  | 0.183 |
|                          | TGF $\beta$ (TGFB1)  | 0.278 | ***    | 0.013  | 0.807  | 0.27   | ***   |
| <b>T cell exhaustion</b> | PD-1 (PDCD1)         | 0.33  | ***    | -0.046 | 0.377  | 0.37   | ***   |
|                          | CTLA4                | 0.357 | ***    | -0.016 | 0.765  | 0.396  | ***   |
|                          | LAG3                 | 0.294 | ***    | 0.013  | 0.8    | 0.372  | ***   |
|                          | TIM-3                | 0.296 | ***    | 0.074  | 0.154  | 0.352  | ***   |
|                          | (HAVCR2)             |       |        |        |        |        |       |
|                          | GZMB                 | 0.092 | 0.0779 | 0.061  | 0.244  | 0.121  | *     |

| Description             | Gene markers  | CCNA2 |       | CCNB1 |       | CCNB2 |        |
|-------------------------|---------------|-------|-------|-------|-------|-------|--------|
|                         |               | Cor   | P     | Cor   | P     | Cor   | P      |
| <b>CD8+ T cell</b>      | CD8A          | 0.236 | ***   | 0.186 | ***   | 0.227 | ***    |
|                         | CD8B          | 0.206 | ***   | 0.188 | ***   | 0.23  | ***    |
| <b>T cell (general)</b> | CD3D          | 0.271 | ***   | 0.278 | ***   | 0.303 | ***    |
|                         | CD3E          | 0.228 | ***   | 0.189 | ***   | 0.222 | ***    |
|                         | CD2           | 0.225 | ***   | 0.205 | ***   | 0.238 | ***    |
| <b>B cell</b>           | CD19          | 0.268 | ***   | 0.232 | ***   | 0.272 | ***    |
|                         | CD79A         | 0.185 | ***   | 0.137 | **    | 0.177 | ***    |
| <b>Monocyte</b>         | CD86          | 0.322 | ***   | 0.316 | ***   | 0.318 | ***    |
|                         | CD115 (CSF1R) | 0.172 | ***   | 0.166 | **    | 0.156 | *      |
| <b>TAM</b>              | CCL2          | 0.076 | 0.144 | 0.034 | 0.512 | 0.065 | 0.211  |
|                         | CD68          | 0.221 | ***   | 0.272 | ***   | 0.216 | ***    |
|                         | IL10          | 0.247 | ***   | 0.249 | ***   | 0.235 | ***    |
| <b>M1 Macrophage</b>    | INOS (NOS2)   | 0.022 | 0.674 | 0.028 | 0.597 | 0.014 | 0.786  |
|                         | IRF5          | 0.369 | ***   | 0.377 | ***   | 0.379 | ***    |
|                         | COX2(PTGS2)   | 0.125 | *     | 0.08  | 0.124 | 0.078 | 0.133  |
| <b>M2 Macrophage</b>    | CD163         | 0.125 | **    | 0.082 | 0.114 | 0.059 | 0.253  |
|                         | VSIG4         | 0.125 | *     | 0.106 | **    | 0.077 | 0.141  |
|                         | MS4A4A        | 0.133 | *     | 0.106 | *     | 0.087 | 0.0945 |

|                            |                      |       |        |       |        |        |        |
|----------------------------|----------------------|-------|--------|-------|--------|--------|--------|
| <b>Neutrophils</b>         | CD66b<br>(CEACAM8)   | 0.091 | 0.0802 | 0.118 | *      | 0.1    | 0.0546 |
|                            | CD11b (ITGAM)        | 0.325 | ***    | 0.304 | ***    | 0.271  | ***    |
|                            | CCR7                 | 0.129 | *      | 0.046 | 0.382  | 0.077  | ***    |
| <b>Natural killer cell</b> | KIR2DL1              | 0.013 | 0.809  | 0.038 | 0.467  | 0.025  | 0.628  |
|                            | KIR2DL3              | 0.179 | ***    | 0.152 | **     | 0.16   | **     |
|                            | KIR2DL4              | 0.218 | ***    | 0.195 | ***    | 0.214  | ***    |
|                            | KIR3DL1              | 0.043 | 0.404  | -0.03 | 0.566  | -0.001 | 0.985  |
|                            | KIR3DL2              | 0.07  | 0.18   | 0.055 | 0.288  | 0.096  | 0.0642 |
|                            | KIR3DL3              | 0.083 | 0.111  | 0.036 | 0.49   | 0.096  | 0.0642 |
|                            | KIR2DS4              | 0.088 | 0.089  | 0.037 | 0.474  | 0.052  | 0.317  |
| <b>Dendritic cell</b>      | HLA-DPB1             | 0.2   | ***    | 0.185 | ***    | 0.194  | ***    |
|                            | HLA-DQB1             | 0.168 | **     | 0.161 | **     | 0.184  | ***    |
|                            | HLA-DRA              | 0.218 | ***    | 0.196 | ***    | 0.183  | ***    |
|                            | HLA-DPA1             | 0.198 | **     | 0.166 | **     | 0.164  | *      |
|                            | BDCA-1(CD1C)         | 0.131 | *      | 0.108 | *      | 0.136  | **     |
|                            | BDCA-4(NRP1)         | 0.246 | ***    | 0.183 | ***    | 0.19   | ***    |
|                            | CD11c (ITGAX)        | 0.354 | ***    | 0.334 | ***    | 0.315  | ***    |
| <b>Th1</b>                 | T-bet (TBX21)        | 0.098 | 0.0599 | 0.05  | 0.34   | 0.086  | 0.0979 |
|                            | STAT4                | 0.263 | ***    | 0.221 | ***    | 0.249  | ***    |
|                            | STAT1                | 0.387 | ***    | 0.375 | ***    | 0.366  | ***    |
|                            | IFN- $\gamma$ (IFNG) | 0.274 | ***    | 0.276 | ***    | 0.293  | ***    |
|                            | TNF- $\alpha$ (TNF)  | 0.268 | ***    | 0.279 | ***    | 0.268  | ***    |
| <b>Th2</b>                 | GATA3                | 0.227 | ***    | 0.188 | ***    | 0.222  | ***    |
|                            | STAT6                | 0.099 | 0.0575 | 0.054 | 0.287  | 0.048  | 0.354  |
|                            | STAT5A               | 0.276 | ***    | 0.232 | ***    | 0.254  | ***    |
|                            | IL13                 | 0.128 | 0.0133 | 0.101 | 0.0527 | 0.101  | 0.0526 |
| <b>Tfh</b>                 | BCL6                 | 0.161 | *      | 0.1   | 0.0554 | 0.089  | 0.0861 |
|                            | IL21                 | 0.181 | ***    | 0.171 | ***    | 0.164  | *      |
| <b>Th17</b>                | STAT3                | 0.175 | ***    | 0.096 | 0.0651 | 0.051  | 0.331  |
|                            | IL17A                | 0.109 | *      | 0.081 | 0.121  | 0.099  | 0.0576 |
| <b>Treg</b>                | FOXP3                | 0.213 | ***    | 0.139 | 0.0073 | 0.163  | *      |
| <b>Treg</b>                | CCR8                 | 0.429 | ***    | 0.375 | ***    | 0.363  | ***    |
|                            | STAT5B               | 0.302 | ***    | 0.177 | ***    | 0.195  | ***    |
|                            | TGF $\beta$ (TGFB1)  | 0.275 | ***    | 0.303 | ***    | 0.295  | ***    |
|                            | PD-1 (PDCD1)         | 0.324 | ***    | 0.323 | ***    | 0.356  | ***    |
| <b>T cell exhaustion</b>   | CTLA4                | 0.335 | ***    | 0.34  | ***    | 0.351  | ***    |
|                            | LAG3                 | 0.293 | ***    | 0.293 | ***    | 0.362  | ***    |
|                            | TIM-3 (HAVCR2)       | 0.348 | ***    | 0.33  | ***    | 0.318  | ***    |
|                            | GZMB                 | 0.087 | 0.0944 | 0.078 | 0.136  | 0.114  | *      |

TAM, tumor-associated macrophage; Th, T helper cell; Tfh, Follicular helper T cell; Treg, regulatory T cell; Cor, R value of Spearman's correlation. \* P <0.01; \*\* P <0.001; \*\*\* P <0.0001.
